# Supplementary material for: Impact of a Training Program on Oncology Nurses’ Confidence in the Provision of Self-Management Support and 5As Behavioral Counseling Skills
Source: MDPI journal article supplement (doi:10.3390/cancers15061811), 2023-03-16
Supplement: s1 [file s1]

# Supplement S1. Application of 5As to Support Patient Self-Management of Immunotherapy Treatment Toxicities

| 5As Step                                                                                                                                                                                                               | Tips and Strategies                                                                                                                                                                                                                                                                                                                                                                                                                                                                                                                                                                                                                                                                                                                                                                                                                                                                                                                                                                  |
|------------------------------------------------------------------------------------------------------------------------------------------------------------------------------------------------------------------------|--------------------------------------------------------------------------------------------------------------------------------------------------------------------------------------------------------------------------------------------------------------------------------------------------------------------------------------------------------------------------------------------------------------------------------------------------------------------------------------------------------------------------------------------------------------------------------------------------------------------------------------------------------------------------------------------------------------------------------------------------------------------------------------------------------------------------------------------------------------------------------------------------------------------------------------------------------------------------------------|
| <b>ASSESS</b>                                                                                                                                                                                                          |                                                                                                                                                                                                                                                                                                                                                                                                                                                                                                                                                                                                                                                                                                                                                                                                                                                                                                                                                                                      |
| <b>Establish Rapport with patient and family</b> <ul style="list-style-type: none"><li>Active listening, trust, respect, genuineness, empathy</li><li>Assess/respond to patient concerns, feelings, distress</li></ul> | <ul style="list-style-type: none"><li>Use open ended questions that invite more than a yes or no response (e.g., “Tell me more about....”)</li><li>Avoid confrontational “why” questions</li><li>Restate (reflect back) what you have heard (e.g., “It sounds like....”)</li><li>Use good eye contact and non-verbal cues (e.g., nodding) to indicate you are listening</li><li>Acknowledge/normalize their emotions (e.g., “So you are feeling....”, “It is not uncommon...to have these feeling...”)</li></ul>                                                                                                                                                                                                                                                                                                                                                                                                                                                                     |
| <b>Establish a mutually agreed upon agenda for the visit</b> <ul style="list-style-type: none"><li>Draw on pre-visit assessments (e.g., ESAS)</li><li>Identify the patient’s priority concerns</li></ul>               | <ul style="list-style-type: none"><li>Assess/clarify the patient’s expectations at each visit (e.g., I have some things to ask you about, but first, tell me what you want to focus on during today’s visit?)</li><li>I see that your pain score is higher this week. Could we talk about this today?</li></ul>                                                                                                                                                                                                                                                                                                                                                                                                                                                                                                                                                                                                                                                                      |
| <b>Assess patient risk factors for poor health</b><br>(e.g., performance status, co-morbidities, mental health conditions, coping, medications, social support, financial issues, education)                           | <ul style="list-style-type: none"><li>Understanding of cancer and what it means to them. (e.g., “How has having cancer impacted on your life? What worries you the most?”)</li><li>Understanding of genomic/biomolecular tests, prognosis, treatment options including I-O therapies (e.g., What do you think about the I-O therapy your doctor has recommended?)</li><li>Disease and treatment-related symptoms, psychological distress, coping</li><li>How have they managed previous health issues? What activities do they use to manage their health/cancer situation?</li><li>Barriers to self-management (e.g., What difficulties have you experienced in managing....?)</li></ul>                                                                                                                                                                                                                                                                                            |
| <b>Assess patient’s readiness to change to take on new self-management behaviors</b><br>(e.g., symptom monitoring, medication management, exercise)                                                                    | <ul style="list-style-type: none"><li>From your perspective, what is the most important aspect of your health that you want to maintain or improve while on I-O treatment?</li><li>On a scale of 0 to 10 how confident are you that you can make this change? Why this number and not a lower number?</li><li>What would help you feel more confident?</li><li>Explore the pros/cons of taking action</li></ul>                                                                                                                                                                                                                                                                                                                                                                                                                                                                                                                                                                      |
| <b>Encourage patients to use health risk appraisal tools</b>                                                                                                                                                           | <ul style="list-style-type: none"><li>e.g., ESAS. model the use of the tools and discuss the results</li></ul>                                                                                                                                                                                                                                                                                                                                                                                                                                                                                                                                                                                                                                                                                                                                                                                                                                                                       |
| <b>ADVISE</b>                                                                                                                                                                                                          |                                                                                                                                                                                                                                                                                                                                                                                                                                                                                                                                                                                                                                                                                                                                                                                                                                                                                                                                                                                      |
| <b>Use behavioral, psychosocial, and tailoring strategies to provide self-management education</b>                                                                                                                     | <ul style="list-style-type: none"><li>Involve the patient in their own care. Ask their permission to share information/advice. (e.g., I have some information here on strategies for how to....Would this be helpful for you?”</li><li>Tailor strategies/messages to patient age, culture, ethnicity, and health literacy</li><li>Use adult learning principles and active learning techniques</li><li>Give clear, specific information and advise about health behaviors that is personalized to the patient, including potential risks/harms and benefits of recommended strategies</li><li>Teach skills patients need to manage their health</li><li>Assist patients to acknowledge/understand their emotional responses, feelings, attitudes related to cancer</li><li>Build patient self-efficacy by indicating your confidence that they can take on new skills/behaviors and acknowledging their personal strengths and previous successes in managing their health</li></ul> |

## 5As Approach - Tip Sheet for I-O Care

| 5As Step                                                                                            | Tips and Strategies                                                                                                                                                                                                                                                                                                                                                                                                                                                                                                                                                                                                                                       |
|-----------------------------------------------------------------------------------------------------|-----------------------------------------------------------------------------------------------------------------------------------------------------------------------------------------------------------------------------------------------------------------------------------------------------------------------------------------------------------------------------------------------------------------------------------------------------------------------------------------------------------------------------------------------------------------------------------------------------------------------------------------------------------|
| <b>ADVISE</b>                                                                                       |                                                                                                                                                                                                                                                                                                                                                                                                                                                                                                                                                                                                                                                           |
| <b>Use Ask-Tell-Ask to make sure patient receives the information</b>                               | <ul style="list-style-type: none"> <li>• Ask: Tailor information to the patient by asking what they know and what they want to know</li> <li>• Tell: Share information the patient wants to know in simple concise language</li> <li>• Ask: Have the patient repeat back what they heard in their own words. Do they have questions or require more information.</li> </ul>                                                                                                                                                                                                                                                                               |
| <b>Use the Close-the-Loop technique to assess patient understanding of the information</b>          | <ul style="list-style-type: none"> <li>• Ask the patient to summarize their understanding of the key points from the discussion.</li> <li>• Clarify and reinforce information that was not understood</li> </ul>                                                                                                                                                                                                                                                                                                                                                                                                                                          |
| <b>Assist patients to use information from self-monitor tools (e.g., pain scores, temperature)</b>  | <ul style="list-style-type: none"> <li>• Review and discuss how to use tools, interpret the information, and how to respond</li> </ul>                                                                                                                                                                                                                                                                                                                                                                                                                                                                                                                    |
| <b>Encourage patients to use monitoring methods (e.g., journals, diaries, logs, health records)</b> | <ul style="list-style-type: none"> <li>• e.g., A Self-Monitoring Guide for Patients Receiving Checkpoint Inhibitors. Nova Scotia Health. <a href="http://www.nshealth.ca/sites/nshealth.ca/files/patientinformation/nsccp1673.pdf">http://www.nshealth.ca/sites/nshealth.ca/files/patientinformation/nsccp1673.pdf</a></li> <li>• Cancer organizations for patients often have excellent self-management support tools using these methods</li> </ul>                                                                                                                                                                                                     |
| <b>AGREE</b>                                                                                        |                                                                                                                                                                                                                                                                                                                                                                                                                                                                                                                                                                                                                                                           |
| <b>Establish goals for improving health at different stages of the cancer continuum</b>             | <ul style="list-style-type: none"> <li>• Respect patient autonomy to make choices about improving their health</li> <li>• Encourage shared-decision-making and the patient's involvement in determining the priority areas of focus for improving their health</li> <li>• The goal should be very important to the patient</li> </ul>                                                                                                                                                                                                                                                                                                                     |
| <b>Develop an action plan to achieve goals</b>                                                      | <ul style="list-style-type: none"> <li>• Help the patient set realistic expectations and incorporate discussion about the patient's values and preferences in the decision-making process</li> <li>• Utilize strategize above to consider patient's readiness and barriers to change</li> <li>• Patients should feel confident (e.g., 7/10 on a confidence scale) that they can achieve the plan.</li> <li>• Be specific. Determine what (specific action), how much (time, distance, amount), when (time, days of the week), how often.</li> <li>• Use Close-the-Loop to ensure the patient understands the action plan and any instructions.</li> </ul> |
| <b>Monitor progress in goal achievement</b>                                                         | <ul style="list-style-type: none"> <li>• Ask how well the strategies worked and explore barriers to achievement</li> </ul>                                                                                                                                                                                                                                                                                                                                                                                                                                                                                                                                |

5As Approach - Tip Sheet for I-O Care

| 5As Step                                                                                                                                                                         | Tips and Strategies                                                                                                                                                                                                                                                                                                                                                                              |
|----------------------------------------------------------------------------------------------------------------------------------------------------------------------------------|--------------------------------------------------------------------------------------------------------------------------------------------------------------------------------------------------------------------------------------------------------------------------------------------------------------------------------------------------------------------------------------------------|
| ASSIST                                                                                                                                                                           |                                                                                                                                                                                                                                                                                                                                                                                                  |
| <ul style="list-style-type: none"><li>Assist the patient to explore their motivation to improve their health and discuss potential barriers to implementing the action</li></ul> | <ul style="list-style-type: none"><li>See assessment of readiness above</li></ul>                                                                                                                                                                                                                                                                                                                |
| <ul style="list-style-type: none"><li>Assist the patient to identify problems in achieving health goals and generate solutions</li></ul>                                         | <ul style="list-style-type: none"><li>What gets in the way of managing their side effects? What might help overcome this barrier?</li><li>Would you like to hear some suggestions from me?</li><li>Out of all the strategies we have discussed today, which one do you think will work best for you?</li></ul>                                                                                   |
| <ul style="list-style-type: none"><li>Link the patient to relevant cancer centre and community services and providers</li></ul>                                                  | <ul style="list-style-type: none"><li>Consider cancer specific and non-cancer specific resources (e.g., supportive care cancer services, support groups, fitness clubs, dieticians, health coaches, online information)</li></ul>                                                                                                                                                                |
| ARRANGE                                                                                                                                                                          |                                                                                                                                                                                                                                                                                                                                                                                                  |
| <ul style="list-style-type: none"><li>Arrange follow-up appointments by telephone, email, or additional or regular cancer clinic visits</li></ul>                                | <ul style="list-style-type: none"><li>Plan follow-up based on patient’s needs, preferences, and availability</li><li>Determine the focus of follow-up appointments (e.g., assessment, monitoring, coaching, reinforcement)</li><li>Facilitate health system navigation, coordination of care, and referrals to specialist providers and self-management support services and resources</li></ul> |

Adapted from:

Glasgow, R.E., Funnell, M.M., Bonomi, A.E., Davis, C., Beckham, V., & Wagner, E.H. (2002). Self-Management Aspects of Improving Chronic Illness Care Breakthrough Series: Implementation with Diabetes and Heart Failure Teams. *Annals of Behavioral Medicine*, 24(2), 80-87.

Medland, M. (2009). *Self-Management Support: A Study and Implementation Guide for Health Care Professionals*. Fraser Health Authority, BC: Fraser Health.

Registered Nurses Association of Ontario. (2010). *Strategies to Support Self-Management in Chronic Conditions: Collaboration with Clients*. Toronto, ON. RNAO

South West Self-Management Program. (2018). *Self-Management Toolkit. A Resource for Health Care Providers*. [www.self-management.ca](http://www.self-management.ca)

Whitelock, Orleans, Pender, & Allan. (2002). Evaluating Primary Care Behavioral Counselling Interventions: An Evidence-Based Approach. *American Journal of Preventive Medicine*, 22(4), 267-284).

## Supplement S2. Cancer Coaching Skills Checklist for Fidelity

|                                                                                                            |                                                                                                                                                    |                                   |                                   |                                   |
|------------------------------------------------------------------------------------------------------------|----------------------------------------------------------------------------------------------------------------------------------------------------|-----------------------------------|-----------------------------------|-----------------------------------|
| <b>Cancer Centre:</b>                                                                                      |                                                                                                                                                    | <input type="checkbox"/> Centre 3 | <input type="checkbox"/> Centre 2 | <input type="checkbox"/> Centre 1 |
| <b>Date of Assessment (DD/MMM/YYYY):</b>                                                                   |                                                                                                                                                    |                                   |                                   |                                   |
| Preparedness of the health coach ( <i>ask these <u>ideally</u> before the visit with the participant</i> ) |                                                                                                                                                    |                                   |                                   |                                   |
|                                                                                                            | Coach is familiar with the content of the I-Can-Manage Cancer modules                                                                              |                                   |                                   |                                   |
|                                                                                                            | Coach can describe open-ended questions that will be used to establish rapport                                                                     |                                   |                                   |                                   |
|                                                                                                            | Coach can describe participant's most recent action plan                                                                                           |                                   |                                   |                                   |
|                                                                                                            | Coach can name his/her goals for the visit                                                                                                         |                                   |                                   |                                   |
| Comments:                                                                                                  |                                                                                                                                                    |                                   |                                   |                                   |
| Greeting and initial communication                                                                         |                                                                                                                                                    |                                   |                                   |                                   |
|                                                                                                            | Coach gives the participant a professional greeting                                                                                                |                                   |                                   |                                   |
|                                                                                                            | Coach establishes rapport.                                                                                                                         |                                   |                                   |                                   |
| Comments:                                                                                                  |                                                                                                                                                    |                                   |                                   |                                   |
| <b>Assess:</b> Setting the agenda for the coaching visit                                                   |                                                                                                                                                    |                                   |                                   |                                   |
|                                                                                                            | Coach establishes collaborative agenda visit with participant.                                                                                     |                                   |                                   |                                   |
|                                                                                                            | Coach restates and documents what participant states (reflections)                                                                                 |                                   |                                   |                                   |
|                                                                                                            | Coach asks if participant has any more questions until the participant has no more to say                                                          |                                   |                                   |                                   |
|                                                                                                            | Coach asks patient if okay to talk about some priority issues (e.g. safe management of treatment side-effects/cancer symptoms, use of medications) |                                   |                                   |                                   |
|                                                                                                            | Coach assesses readiness (importance and confidence)                                                                                               |                                   |                                   |                                   |
|                                                                                                            | Coach asks participant to prioritize discussion topics and select two or three for the session                                                     |                                   |                                   |                                   |
|                                                                                                            | Coach and participant agree on the agenda for the visit                                                                                            |                                   |                                   |                                   |
| Comments:                                                                                                  |                                                                                                                                                    |                                   |                                   |                                   |
| <b>Advise:</b> Ask-Tell-Ask and Teach Back                                                                 |                                                                                                                                                    |                                   |                                   |                                   |
|                                                                                                            | Coach actively listens without interrupting                                                                                                        |                                   |                                   |                                   |
|                                                                                                            | Coach's comments and tone are used in a friendly, accessible and not judgmental manner                                                             |                                   |                                   |                                   |
|                                                                                                            | Coach asks participant questions relevant to the topic at hand                                                                                     |                                   |                                   |                                   |
|                                                                                                            | Coach provides information or advice only when participant asks or doesn't know                                                                    |                                   |                                   |                                   |
|                                                                                                            | treatment effects                                                                                                                                  |                                   |                                   |                                   |
|                                                                                                            | If coach does not know information, says "How can we find that information?" or "I will find out and get back to you"                              |                                   |                                   |                                   |
|                                                                                                            | Coach teaches the patient steps in problem-solving and patient comes up with way to get the information                                            |                                   |                                   |                                   |
|                                                                                                            | Coach teaches the patient about self-monitoring and adjusting behaviours/actions using this data                                                   |                                   |                                   |                                   |

|           |                                                                                                                                                        |
|-----------|--------------------------------------------------------------------------------------------------------------------------------------------------------|
|           | Coach ensures the participant understands the information (in their own words)-asks patient to talk back advise given and specific actions to be taken |
|           | Coach takes advantage of learning moments to ask questions (e.g. What is your goal for managing pain?)                                                 |
| Comments: |                                                                                                                                                        |

Supplement S3: Pre/Post Training: Nurses' Confidence in SMS Micro Skills

| Items                                                                                    | Strongly Disagree | Disagree | Neither Agree/ Disagree | Agree | Strongly Agree    |
|------------------------------------------------------------------------------------------|-------------------|----------|-------------------------|-------|-------------------|
| <b>1. Overall the course.....</b>                                                        |                   |          |                         |       |                   |
| a. Was a valuable use of my time                                                         | 1                 | 2        | 3                       | 4     | 5                 |
| b. Was relevant to my professional practice                                              | 1                 | 2        | 3                       | 4     | 5                 |
| c. Taught skills that I can implement in my practice                                     | 1                 | 2        | 3                       | 4     | 5                 |
| d. Is something that I can recommend to a friend or colleague                            | 1                 | 2        | 3                       | 4     | 5                 |
| e. Taught skills that will enhance how I educate patients to manage cancer and treatment | 1                 | 2        | 3                       | 4     | 5                 |
| <b>2. Please rate your satisfaction with the.....</b>                                    |                   |          |                         |       |                   |
|                                                                                          | Very Satisfied    |          | Neither                 |       | Very Dissatisfied |
| a. Overall course                                                                        | 1                 | 2        | 3                       | 4     | 5                 |
| b. Location                                                                              | 1                 | 2        | 3                       | 4     | 5                 |
| c. Time spent/duration of the course                                                     | 1                 | 2        | 3                       | 4     | 5                 |
| d. Teaching methods used                                                                 |                   |          |                         |       |                   |
| • Reading materials                                                                      | 1                 | 2        | 3                       | 4     | 5                 |
| • Learning activities                                                                    | 1                 | 2        | 3                       | 4     | 5                 |
| • Opportunities for skills practice                                                      | 1                 | 2        | 3                       | 4     | 5                 |
| e. Opportunities to exchange ideas                                                       | 1                 | 2        | 3                       | 4     | 5                 |
| f. Opportunities to build collegial relationships                                        | 1                 | 2        | 3                       | 4     | 5                 |
| <b>3. Please rate each facilitator in terms of his or her.....</b>                       |                   |          |                         |       |                   |
| a. Ability to foster a safe, supportive learning environment                             | 1                 | 2        | 3                       | 4     | 5                 |
| b. Ability to provide helpful feedback                                                   | 1                 | 2        | 3                       | 4     | 5                 |
| c. Ability to model the skills taught while interacting with you today                   | 1                 | 2        | 3                       | 4     | 5                 |
| d. Knowledge of content                                                                  | 1                 | 2        | 3                       | 4     | 5                 |
| e. Clarity of presentation                                                               | 1                 | 2        | 3                       | 4     | 5                 |

**4. As a result of this course, how confident are you in the following areas (1- no confidence to 5-very confident):**

|                                                                                                                                                                | No<br>Confidence |   | Somewhat<br>Confident |   | Very<br>Confident |
|----------------------------------------------------------------------------------------------------------------------------------------------------------------|------------------|---|-----------------------|---|-------------------|
| a. Defining self-management support and how it differs from patient education                                                                                  | 1                | 2 | 3                     | 4 | 5                 |
| b. Supporting patients in making difficult decisions                                                                                                           | 1                | 2 | 3                     | 4 | 5                 |
|                                                                                                                                                                |                  |   |                       |   |                   |
| c. As a result of this course, how confident are you in <u>using the following elements</u> of the 5A's Model to provide patients with self-management support |                  |   |                       |   |                   |
|                                                                                                                                                                | No<br>Confidence |   | Somewhat<br>Confident |   | Very<br>Confident |
| • <b>Assess</b>                                                                                                                                                |                  |   |                       |   |                   |
| ▪ Establish rapport                                                                                                                                            | 1                | 2 | 3                     | 4 | 5                 |
| ▪ Setting the visit agenda                                                                                                                                     | 1                | 2 | 3                     | 4 | 5                 |
| ▪ Assess client readiness to make a change                                                                                                                     | 1                | 2 | 3                     | 4 | 5                 |
| ▪ Goal setting                                                                                                                                                 | 1                | 2 | 3                     | 4 | 5                 |
| • <b>Advise</b>                                                                                                                                                |                  |   |                       |   |                   |
| ▪ Tailoring strategies for selection                                                                                                                           | 1                | 2 | 3                     | 4 | 5                 |
| ▪ Ask-tell-ask                                                                                                                                                 | 1                | 2 | 3                     | 4 | 5                 |
| ▪ Closing the loop                                                                                                                                             | 1                | 2 | 3                     | 4 | 5                 |
| • <b>Agree</b>                                                                                                                                                 |                  |   |                       |   |                   |
| ▪ Action plans and follow-up                                                                                                                                   | 1                | 2 | 3                     | 4 | 5                 |
| • <b>Assist</b>                                                                                                                                                |                  |   |                       |   |                   |
| ▪ Problem solving                                                                                                                                              | 1                | 2 | 3                     | 4 | 5                 |
| ▪ Linking to community resources                                                                                                                               | 1                | 2 | 3                     | 4 | 5                 |
| ▪ Teaching self-monitoring skills                                                                                                                              | 1                | 2 | 3                     | 4 | 5                 |
| ▪ Review goal and action plan                                                                                                                                  | 1                | 2 | 3                     | 4 | 5                 |
| • <b>Arrange</b>                                                                                                                                               |                  |   |                       |   |                   |
| ▪ Follow-up                                                                                                                                                    | 1                | 2 | 3                     | 4 | 5                 |
